# Supplementary material for: An Egocentric Network Contact Tracing Experiment: Testing Different Procedures to Elicit Contacts and Places
Source: PubMed Central journal article supplement (PMC7916034; doi:10.3390/ijerph18041466), 2021-02-04
Supplement: ijerph-18-01466-s001.pdf [file ijerph-18-01466-s001.pdf]

## Questionnaire

### *Race*

Which option best describes your race?

- (a) American Indian or Alaska Native
- (b) Asian
- (c) Black or African American
- (d) Hispanic or Latino Origin
- (e) Native Hawaiian or Other Pacific Islander
- (f) White
- (g) Other

### *Gender*

Which option best describes your gender?

- (a) man
- (b) woman
- (c) non-binary
- (d) prefer not to disclose
- (e) prefer to self-describe

*Mood: (Rholes et al. [26]; Cronbach's alpha = 0.91)*

- (a) I am generally in an elated mood.
- (b) I am generally in a cheerful mood.
- (c) I am generally in a happy mood.
- (d) I am generally in a good mood.
- (e) I am generally in a sad mood.
- (f) I am generally in a discouraged mood.
- (g) I am generally in a depressed mood.
- (h) I am generally in a bad mood.

The answer categories were

- (1) Strongly disagree
- (2) Disagree
- (3) Neither agree nor disagree
- (4) Agree
- (5) Strongly agree

*Well-being: (Shea et al. [13]; Cronbach's alpha = 0.86)*

- (a) How satisfied are you with your standard of living?
- (b) How satisfied are you with your health?
- (c) How satisfied are you with what you are achieving in life?
- (d) How satisfied are you with your personal relationships?
- (e) How satisfied are you with how safe you feel?
- (f) How satisfied are you with feeling part of your community?
- (g) How satisfied are you with your future security?
- (h) How satisfied are you with the amount of time you have to do the things that you like doing?

The answer categories were

- (1) Strongly dissatisfied
- (2) Dissatisfied
- (3) Neither satisfied nor dissatisfied
- (4) Satisfied

(5) Strongly satisfied

*Physical functioning: (Ross and Mirowsky [27]; Cronbach's alpha = 0.81)*

Do you have any trouble or difficulties

- (a) walking?
- (b) using stairs or inclines?
- (c) standing or sitting for long periods?
- (d) using your fingers to grasp or handle?
- (e) lifting or carrying something as heavy as 10 pounds?

The answer categories were

- (1) No
- (2) Yes, some
- (3) Yes, a great deal

*Mask efficacy*

Do you think wearing a mask helps to reduce the spread of COVID-19?

The answer categories were

- (1) No, it increases the spread
- (2) No, it does nothing
- (3) Not sure
- (4) Yes, some
- (5) Yes, a lot

*COVID: Worry*

How worried are you about getting COVID-19?

The answer categories were

- (1) Not worried at all
- (2) Somewhat worried
- (3) A little worried
- (4) Very worried

*COVID: Seriousness*

On a scale of 1–10, how serious of a public health threat is COVID-19?

The answer categories were 1 = being no threat and 10 = being very serious
